# Supplementary material for: Safety, tolerability and efficacy of the glutaminyl cyclase inhibitor PQ912 in Alzheimer’s disease: results of a randomized, double-blind, placebo-controlled phase 2a study
Source: PubMed Central journal article supplement (PMC6182869; doi:10.1186/s13195-018-0431-6), 2018-10-12
Supplement: 13195_2018_431_MOESM2_ESM.pdf [file 13195_2018_431_MOESM2_ESM.pdf]

**Table S1: Summary statistics and treatment effects of CSF, EEG, (Rs)fMRI and cognition parameters. Difference (delta) plus 95% Confidence Intervals between treatment groups at EOT , controlled for baseline, age, gender, ApoE and country is presented . Negative Cohen's D indicate lower values at EOT in PQ912 group (less increase or more decrease).**

| CSF: median (Q1 - Q3) for baseline and EOT for groups placebo and PQ912, ANCOVA analyses on PP dataset and on log10-transformed values |          |                       |     |                       |          |                       |     |                       |                |                          |       |           |
|----------------------------------------------------------------------------------------------------------------------------------------|----------|-----------------------|-----|-----------------------|----------|-----------------------|-----|-----------------------|----------------|--------------------------|-------|-----------|
| parameter                                                                                                                              | placebo  |                       |     |                       | PQ912    |                       |     |                       | results ANCOVA |                          |       |           |
|                                                                                                                                        | baseline |                       | EOT |                       | baseline |                       | EOT |                       | N              | delta (95%CI)            | p     | Cohen's D |
|                                                                                                                                        | N        | median (Q1 - Q3)      | N   | median (Q1 - Q3)      | N        | median (Q1 - Q3)      | N   | median (Q1 - Q3)      |                |                          |       |           |
| Total-Tau in CSF (pg/mL)                                                                                                               | 42       | 710 (485 - 974)       | 42  | 620.5 (511 - 947)     | 26       | 651 (514 - 934)       | 26  | 678.5 (485 - 874)     | 66             | -0.01 (-0.038 ; 0.018)   | 0.485 | -0.05     |
| Amyloid-Beta in CSF (pg/mL)                                                                                                            | 42       | 549 (493 - 617)       | 42  | 559.5 (483 - 647)     | 26       | 517.5 (492 - 567)     | 26  | 538.5 (477 - 578)     | 66             | -0.002 (-0.034 ; 0.03)   | 0.896 | -0.02     |
| Total-Tau/Amyloid-Beta in CSF                                                                                                          | 42       | 1.315 (0.931 - 1.734) | 42  | 1.162 (0.863 - 1.890) | 26       | 1.311 (0.931 - 1.824) | 26  | 1.232 (0.841 - 1.668) | 66             | -0.026 (-0.066 ; 0.013)  | 0.187 | -0.12     |
| Phospho-Tau in CSF (pg/mL)                                                                                                             | 42       | 87.5 (72 - 117)       | 42  | 86 (72 - 114)         | 26       | 86 (69 - 106)         | 26  | 86 (66 - 114)         | 66             | -0.001 (-0.023 ; 0.022)  | 0.951 | -0.01     |
| Glutaminy cyclase activity (mU/L)                                                                                                      | 41       | 120.8 (101.3 - 140.2) | 41  | 120.3 (104.1 - 137.5) | 26       | 110.2 (94.8 - 134.2)  | 26  | 35.6 (29.7 - 63.2)    | 65             | -0.454 (-0.507 ; -0.4)   | <.001 | -1.66     |
| Neurogranin (pg/ml)                                                                                                                    | 41       | 419 (348 - 583)       | 41  | 411 (328 - 517)       | 26       | 422 (314 - 530)       | 26  | 391 (298 - 516)       | 64             | -0.021 (-0.054 ; 0.011)  | 0.194 | -0.12     |
| BACE1 (pg/ml)                                                                                                                          | 41       | 2154 (1847 - 2525)    | 41  | 2165 (1798 - 2554)    | 26       | 2061.5 (1767 - 2388)  | 26  | 1928 (1758 - 2470)    | 64             | 0.002 (-0.012 ; 0.016)   | 0.788 | 0.02      |
| Contactin2 (ng/ml)                                                                                                                     | 41       | 72.98 (54.75 - 83.8)  | 41  | 69.86 (52.38 - 86.95) | 26       | 64.08 (54.77 - 77.56) | 26  | 63 (51.37 - 85.43)    | 64             | -0.006 (-0.049 ; 0.037)  | 0.789 | -0.03     |
| NFL (pg/ml)                                                                                                                            | 41       | 1164 (839 - 1491)     | 41  | 1230 (888 - 1493)     | 26       | 1186 (921 - 1800)     | 26  | 1185 (930 - 1632)     | 64             | 0.035 (-0.031 ; 0.101)   | 0.290 | 0.18      |
| YKL40 (pg/ml)                                                                                                                          | 41       | 367 (295 - 476)       | 41  | 353 (274 - 469)       | 26       | 292 (232 - 412)       | 26  | 297 (219 - 384)       | 64             | -0.032 (-0.059 ; -0.004) | 0.025 | -0.20     |
| Ng/BACE1                                                                                                                               | 41       | 0.206 (0.174 - 0.24)  | 41  | 0.205 (0.171 - 0.226) | 26       | 0.201 (0.160 - 0.228) | 26  | 0.193 (0.163 - 0.215) | 64             | -0.019 (-0.044 ; 0.005)  | 0.114 | -0.16     |
| P-Tau/T-Tau                                                                                                                            | 42       | 0.134 (0.119 - 0.144) | 42  | 0.127 (0.118 - 0.147) | 26       | 0.122 (0.112 - 0.138) | 26  | 0.13 (0.111 - 0.139)  | 66             | -0.002 (-0.029 ; 0.026)  | 0.909 | -0.02     |
| pEAbeta oligomer                                                                                                                       | 42       | 0.01 (0.00 - 0.54)    | 42  | 0.26 (0.00 - 0.58)    | 25       | 0.51 (0.22 - 0.99)    | 26  | 0.44 (0.00 - 1.42)    |                | n.a.                     |       |           |
| pEAbeta monomer                                                                                                                        | 42       | 0.8 (0.00 - 1.33)     | 42  | 0.67 (0.01 - 1.85)    | 25       | 0.98 (0.11 - 2.18)    | 26  | 1.1 (0.40 - 2.11)     |                | n.a.                     |       |           |

| EEG: mean (SD) for baseline and EOT for groups placebo and PQ912, ANCOVA on imputed ITT dataset |          |                 |     |                 |          |                 |     |                 |                |                          |       |           |
|-------------------------------------------------------------------------------------------------|----------|-----------------|-----|-----------------|----------|-----------------|-----|-----------------|----------------|--------------------------|-------|-----------|
| parameter                                                                                       | placebo  |                 |     |                 | PQ912    |                 |     |                 | results ANCOVA |                          |       |           |
|                                                                                                 | baseline |                 | EOT |                 | baseline |                 | EOT |                 | N              | delta (95%CI)            | p     | Cohen's D |
|                                                                                                 | N        | mean (SD)       | N   | mean (SD)       | N        | mean (SD)       | N   | mean (SD)       |                |                          |       |           |
| MEAN PEAK FREQUENCY PARIETO-OCCIPITAL (Hz) AVG, 1st level                                       | 60       | 8.8664 (1.2332) | 55  | 8.7188 (1.1766) | 60       | 8.8611 (1.3633) | 47  | 8.7294 (1.3994) | 100            | -0.017 (-0.435 ; 0.402)  | 0.938 | -0.01     |
| Log10-transformed ALPHA RELATIVE POWER GLOBAL AVG, 1st level                                    | 60       | 0.2924 (0.1509) | 55  | 0.2859 (0.1316) | 60       | 0.2778 (0.1376) | 47  | 0.2747 (0.137)  | 100            | 0.008 (-0.038 ; 0.053)   | 0.746 | 0.04      |
| Log10-transformed THETA RELATIVE POWER GLOBAL AVG, 1st level                                    | 60       | 0.1647 (0.0794) | 55  | 0.1762 (0.0819) | 60       | 0.1763 (0.0976) | 47  | 0.1695 (0.0881) | 100            | -0.057 (-0.093 ; -0.021) | 0.002 | -0.29     |
| THETA / ALPHA RELATIVE POWER GLOBAL, 1st level                                                  | 60       | 0.788 (0.683)   | 55  | 0.786 (0.597)   | 60       | 0.847 (0.850)   | 47  | 0.840 (0.728)   | 100            | -0.026 (-0.126 ; 0.073)  | 0.599 | -0.04     |
| ALPHA PLI GLOBAL AVG, 2nd level, functional connectivity                                        | 60       | 0.1837 (0.0702) | 55  | 0.1884 (0.0765) | 60       | 0.1767 (0.0634) | 47  | 0.1737 (0.0652) | 100            | -0.003 (-0.021 ; 0.015)  | 0.778 | -0.04     |
| ALPHA MST LEAF FRACTION GLOBAL AVG, 3rd level                                                   | 60       | 0.5815 (0.0565) | 55  | 0.5884 (0.0613) | 60       | 0.5868 (0.0473) | 47  | 0.5851 (0.0459) | 100            | -0.007 (-0.027 ; 0.013)  | 0.475 | -0.13     |
| ALPHA PLI MEAN OF MST AVG, 3rd level                                                            | 60       | 0.3866 (0.1076) | 55  | 0.3932 (0.1185) | 60       | 0.3754 (0.1007) | 47  | 0.3676 (0.0969) | 100            | -0.006 (-0.031 ; 0.019)  | 0.620 | -0.06     |
| ALPHA MST TREE HIERARCHY GLOBAL AVG, 3rd level                                                  | 60       | 0.3955 (0.032)  | 55  | 0.3995 (0.0323) | 60       | 0.4022 (0.0267) | 47  | 0.4033 (0.0319) | 100            | -0.002 (-0.015 ; 0.011)  | 0.751 | -0.06     |

| Rs(f)MRI: mean (SD) for baseline and EOT for groups placebo and PQ912, ANCOVA on imputed ITT dataset |          |               |     |                    |          |              |     |                    |                |                         |       |           |
|------------------------------------------------------------------------------------------------------|----------|---------------|-----|--------------------|----------|--------------|-----|--------------------|----------------|-------------------------|-------|-----------|
| parameter                                                                                            | placebo  |               |     |                    | PQ912    |              |     |                    | results ANCOVA |                         |       |           |
|                                                                                                      | baseline |               | EOT |                    | baseline |              | EOT |                    | N              | delta (95%CI)           | p     | Cohen's D |
|                                                                                                      | N        | mean (SD)     | N   | mean (SD)          | N        | mean (SD)    | N   | mean (SD)          |                |                         |       |           |
| PERCENTAGE BRAIN VOLUME CHANGE (basic MRI)                                                           | 59       | 1406.7 (94.9) | 59  | change= -0.3 (0.6) | 60       | 1386 (80)    | 54  | change= -0.6 (0.8) | 109            | -0.143 (-0.41 ; 0.124)  | 0.291 | -0.20     |
| Log10-transformed MEAN Z-STATISTICS DEFAULT MODE NETWORK                                             | 59       | 6.15 (1.84)   | 47  | 5.59 (2.35)        | 60       | 6.16 (1.93)  | 41  | 4.99 (1.68)        | 86             | -0.019 (-0.082 ; 0.045) | 0.560 | -0.11     |
| MEC CUNEUS AND LATERAL OCCIPITAL REGIONS*                                                            | 59       | 6.11 (0.10)   | 47  | 6.14 (0.10)        | 60       | 6.09 (0.12)  | 41  | 6.08 (0.11)        | 86             | -0.062 (-0.105 ; -0.02) | 0.005 | -0.58     |
| MEC ANTERIOR CINGULATE AND PARACINGULATE GYRUS*                                                      | 59       | 6.00 (0.13)   | 47  | 5.98 (0.13)        | 60       | 6.02 (0.12)  | 41  | 5.99 (0.09)        | 86             | -0.004 (-0.051 ; 0.044) | 0.880 | -0.03     |
| MEAN CLUSTERING COEFFICIENT*                                                                         | 59       | 2.43 (0.68)   | 47  | 2.52 (0.73)        | 60       | 2.53 (0.73)  | 41  | 2.49 (0.83)        | 86             | 0.037 (-0.272 ; 0.346)  | 0.812 | 0.05      |
| MEAN PATH LENGTH*                                                                                    | 59       | 22.96 (2.95)  | 47  | 23.72 (3.63)       | 60       | 23.14 (4.45) | 41  | 22.89 (4.09)       | 86             | -0.963 (-2.766 ; 0.84)  | 0.291 | -0.25     |

Cognition: mean (SD) for baseline and EOT for groups placebo and PQ912, ANCOVA on imputed ITT dataset

| parameter                                                    | placebo  |                |     |                | PQ912    |                |     |               | results ANCOVA |                         |       |           |
|--------------------------------------------------------------|----------|----------------|-----|----------------|----------|----------------|-----|---------------|----------------|-------------------------|-------|-----------|
|                                                              | baseline |                | EOT |                | baseline |                | EOT |               | N              | delta (95%CI)           | p     | Cohen's D |
|                                                              | N        | mean (SD)      | N   | mean (SD)      | N        | mean (SD)      | N   | mean (SD)     |                |                         |       |           |
| Episodic Memory (standardised AVG(OCL,ISRL,ISL))             | 60       | -0.045 (0.766) | 60  | -0.017 (0.862) | 60       | 0.045 (0.783)  | 52  | 0.076 (0.835) | 109            | -0.113 (-0.31 ; 0.084)  | 0.259 | -0.13     |
| Executive Function (standardised AVG(LFT,CFT,ONB))           | 60       | -0.011 (0.676) | 60  | -0.035 (0.675) | 60       | 0.011 (0.707)  | 52  | 0.046 (0.882) | 109            | 0.009 (-0.155 ; 0.173)  | 0.911 | 0.01      |
| Attention (standardised AVG(DET,IDN))                        | 60       | 0.015 (0.806)  | 60  | -0.154 (0.865) | 60       | -0.015 (0.866) | 52  | -0.067 (1.02) | 109            | 0.117 (-0.162 ; 0.396)  | 0.406 | 0.13      |
| Overall Cognition (standardised AVG(all cognitive measures)) | 60       | -0.017 (0.564) | 60  | -0.058 (0.634) | 60       | 0.017 (0.563)  | 52  | 0.029 (0.696) | 109            | -0.02 (-0.141 ; 0.1)    | 0.738 | -0.03     |
| MMSE score                                                   | 60       | 24.8 (3.3)     | 60  | 25 (3.4)       | 60       | 25.2 (3.0)     | 55  | 24.6 (3.0)    | 112            | -0.466 (-1.269 ; 0.337) | 0.252 | -0.15     |
| <b>subtests</b>                                              |          |                |     |                |          |                |     |               |                |                         |       |           |
| LFT - Number of words-Total                                  | 60       | 35.9 (12.2)    | 60  | 36.1 (12.2)    | 60       | 37 (11.3)      | 54  | 36 (13.6)     | 111            | -1.847 (-4.817 ; 1.122) | 0.220 | -0.14     |
| CFT - Number of words-Total                                  | 60       | 13.8 (5.4)     | 60  | 13.9 (5.6)     | 60       | 14.1 (4.9)     | 54  | 13.9 (6.1)    | 111            | -0.405 (-1.947 ; 1.137) | 0.603 | -0.07     |
| Detection (log10 ms)                                         | 60       | 2.569 (0.143)  | 60  | 2.592 (0.127)  | 60       | 2.568 (0.137)  | 52  | 2.565 (0.151) | 109            | -0.029 (-0.075 ; 0.017) | 0.221 | -0.21     |
| Identification (log10 ms)                                    | 60       | 2.734 (0.067)  | 60  | 2.747 (0.078)  | 60       | 2.739 (0.081)  | 52  | 2.749 (0.087) | 109            | -0.003 (-0.026 ; 0.02)  | 0.795 | -0.04     |
| One-card learning (arcsine square root)                      | 60       | 0.859 (0.103)  | 60  | 0.868 (0.105)  | 60       | 0.865 (0.085)  | 52  | 0.866 (0.103) | 109            | -0.016 (-0.05 ; 0.019)  | 0.372 | -0.15     |
| One-back memory (log10 ms)                                   | 60       | 3.018 (0.130)  | 60  | 3.028 (0.128)  | 60       | 3.028 (0.120)  | 52  | 3.011 (0.129) | 109            | -0.03 (-0.06 ; 0)       | 0.050 | -0.23     |
| International Shopping List - Summary of all trials          | 60       | 14.5 (4.5)     | 60  | 14.7 (4.9)     | 60       | 14.8 (4.6)     | 52  | 15.2 (5.1)    | 109            | -0.481 (-1.888 ; 0.927) | 0.499 | -0.10     |
| International Shopping List - Recall                         | 60       | 3.0 (2.6)      | 60  | 2.8 (2.6)      | 60       | 3.4 (2.7)      | 52  | 3.3 (2.7)     | 109            | -0.011 (-0.694 ; 0.672) | 0.975 | 0.00      |

\* values are multiplied by 1000  
MEC = Mean Eigenvector Centrality
